# Supplementary material
Source: PubMed Central journal article supplement (PMC5685893)
Supplement: NIHMS912221-supplement-SI.pdf [file NIHMS912221-supplement-SI.pdf]

**SUPPORTING INFORMATION**

**Hybrid All-Atom/Coarse-Grained Simulations of Proteins by  
Direct Coupling of CHARMM and PRIMO Force Fields**

Parimal Kar, Michael Feig\*

Department of Biochemistry and Molecular Biology, Michigan State University,  
East Lansing, Michigan 48824, United States

\*Corresponding author:

Email: feig@msu.edu

Phone: +1 (517) 432-7439

Fax: +1 (517) 353-9334.

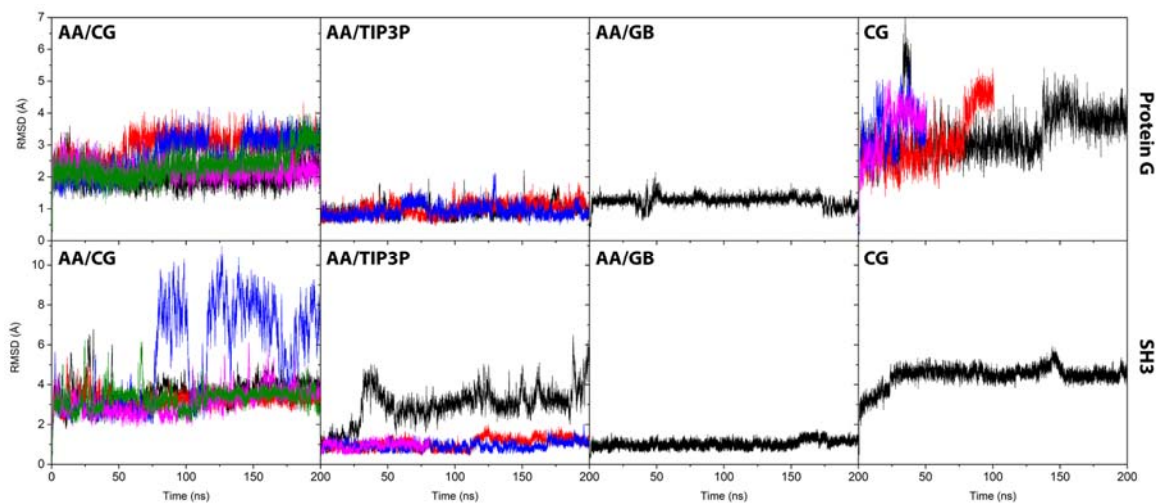

**Figure S1:** Time evolution of  $C_{\alpha}$  root-mean-squared-deviation (RMSD) with respect to the experimental structure for protein G (PDB code: 3GB1, top), and the SH3 domain (PDB code: 1SHG, bottom) with the hybrid AA/CG model (AA/CG), fully atomistic simulations with explicit solvent (AA/TIP3P), AA/GBMV (AA/GB), or coarse-grained simulations using the PRIMO force field (CG). Different colored lines represent simulation replicates.

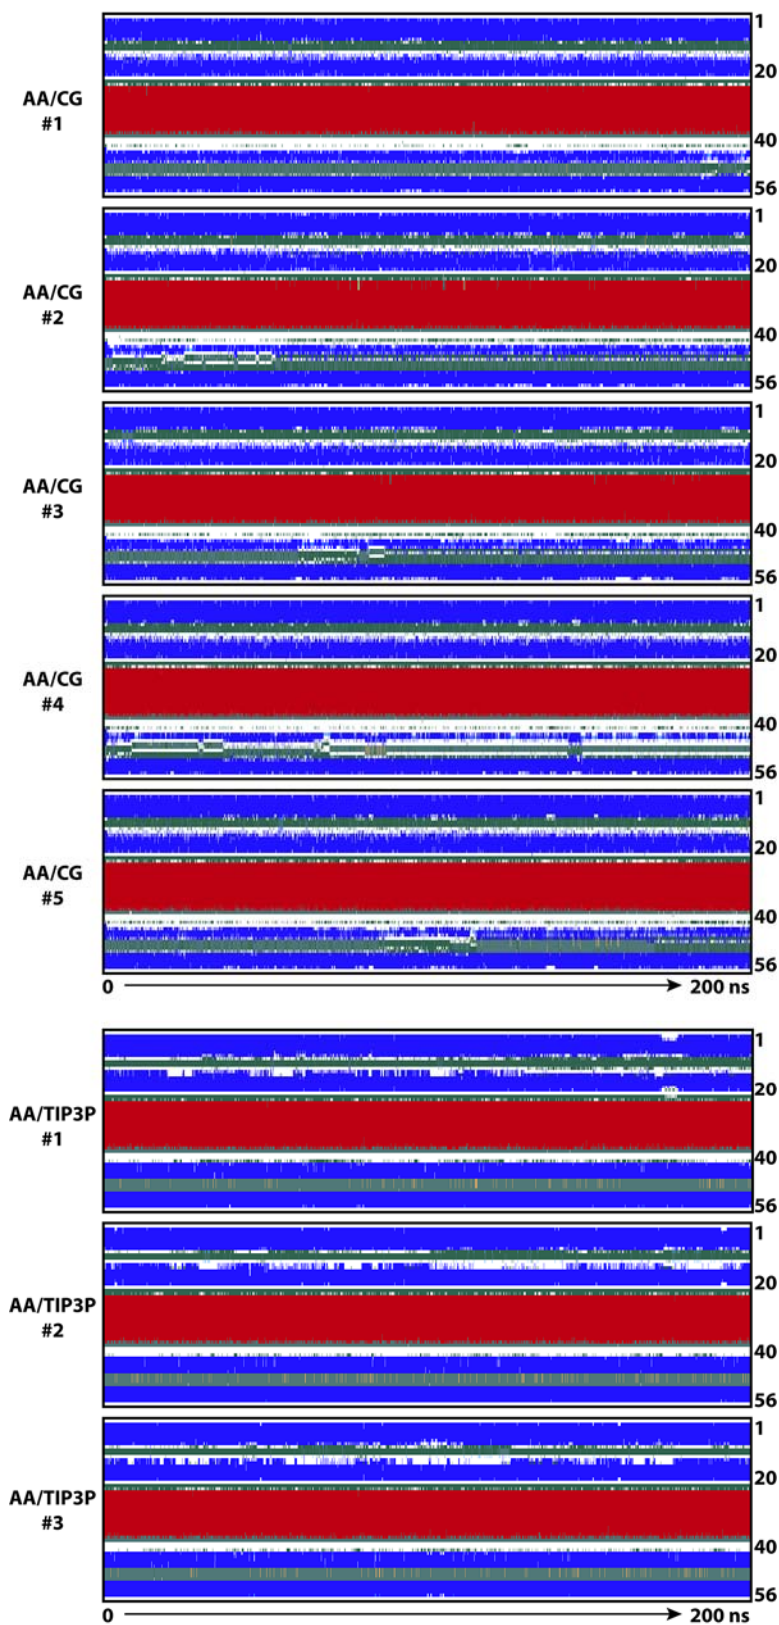

**Figure S2:** Time evolution of secondary structure for protein G based on DSSP analysis for AA/CG and AA/TIP3P simulations ( $\alpha$ -helix: red;  $\beta$ -sheet: blue/light blue; orange:  $3^{10}$ -helix; turn: grey; bend: dark green).

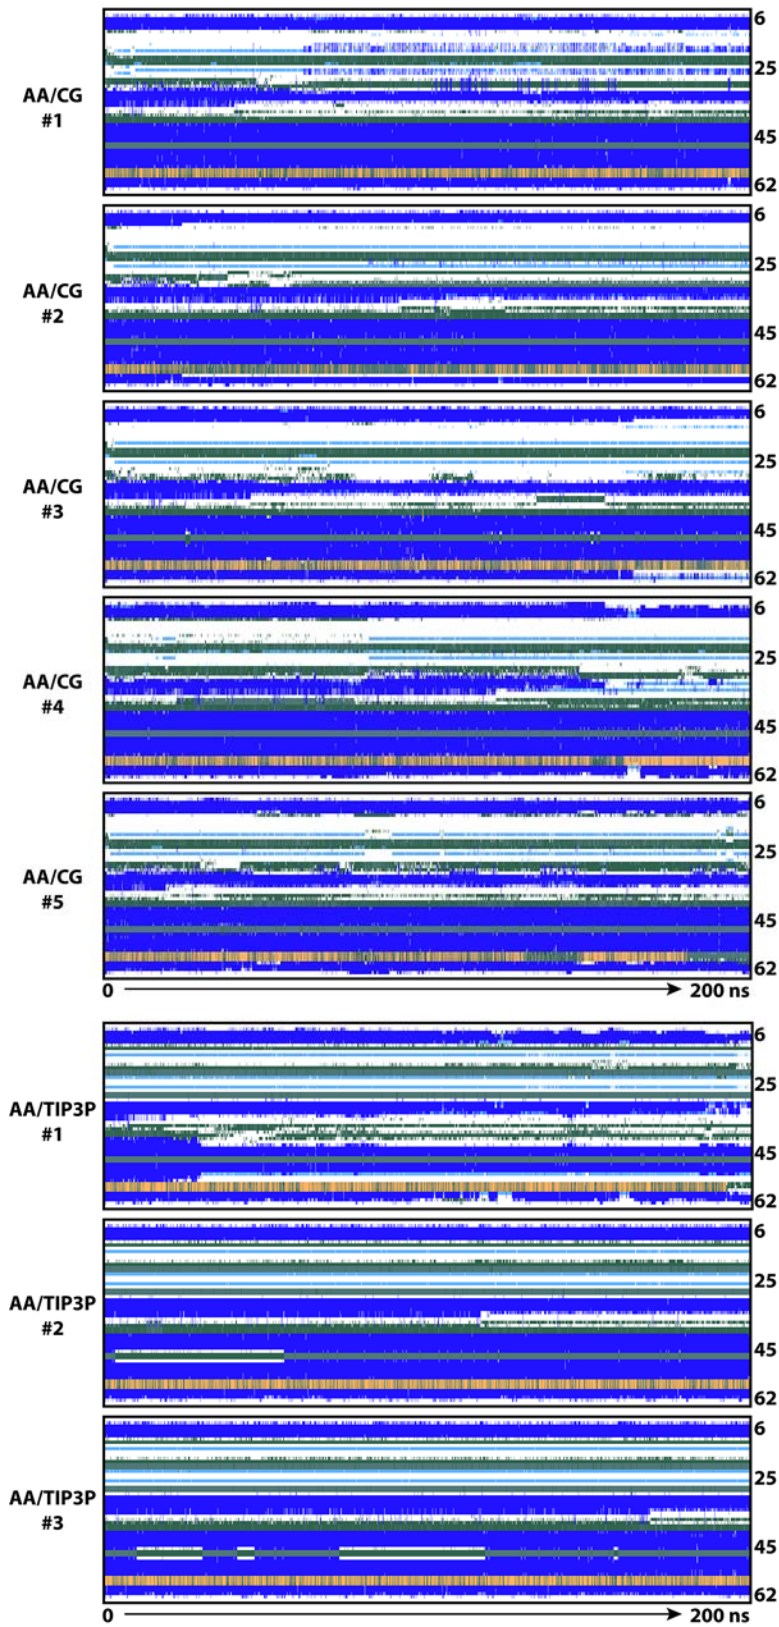

**Figure S3:** Time evolution of secondary structure for SH3 domain based on DSSP analysis for AA/CG and AA/TIP3P simulations (colors as in Fig. S2).

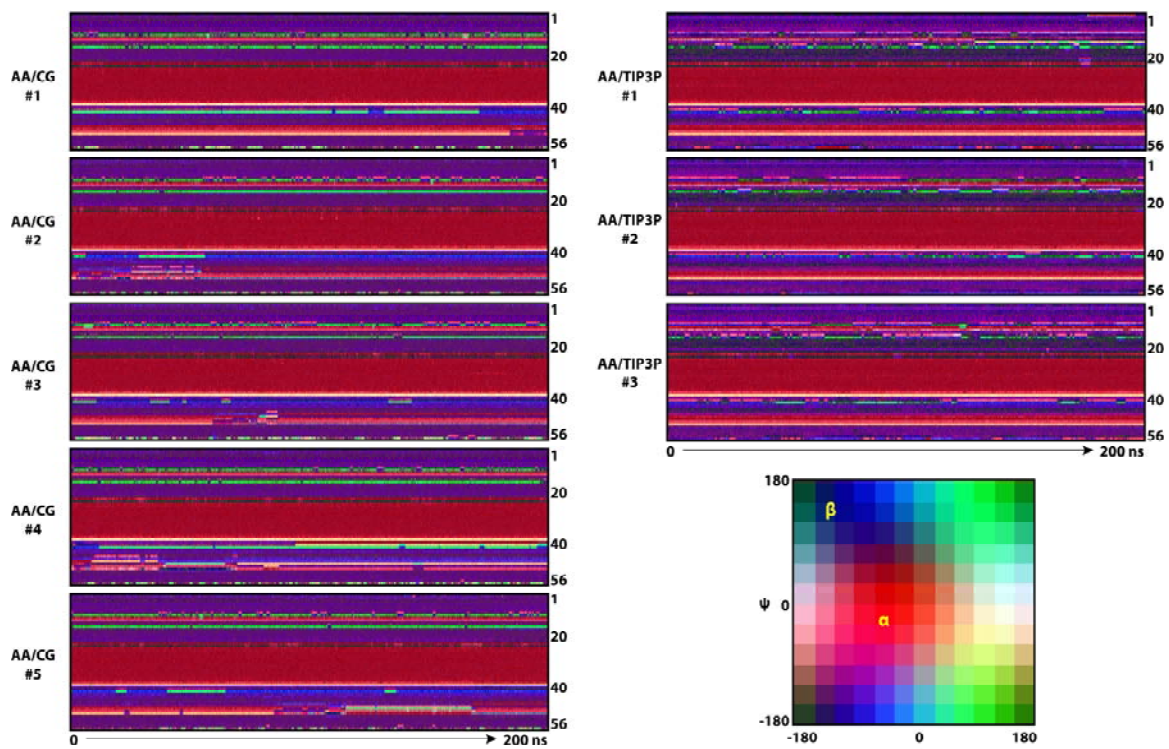

**Figure S4:** Time evolution of  $\phi/\psi$  backbone torsion angles for protein G in AA/CG and AA/TIP3P simulations according to color diagram.



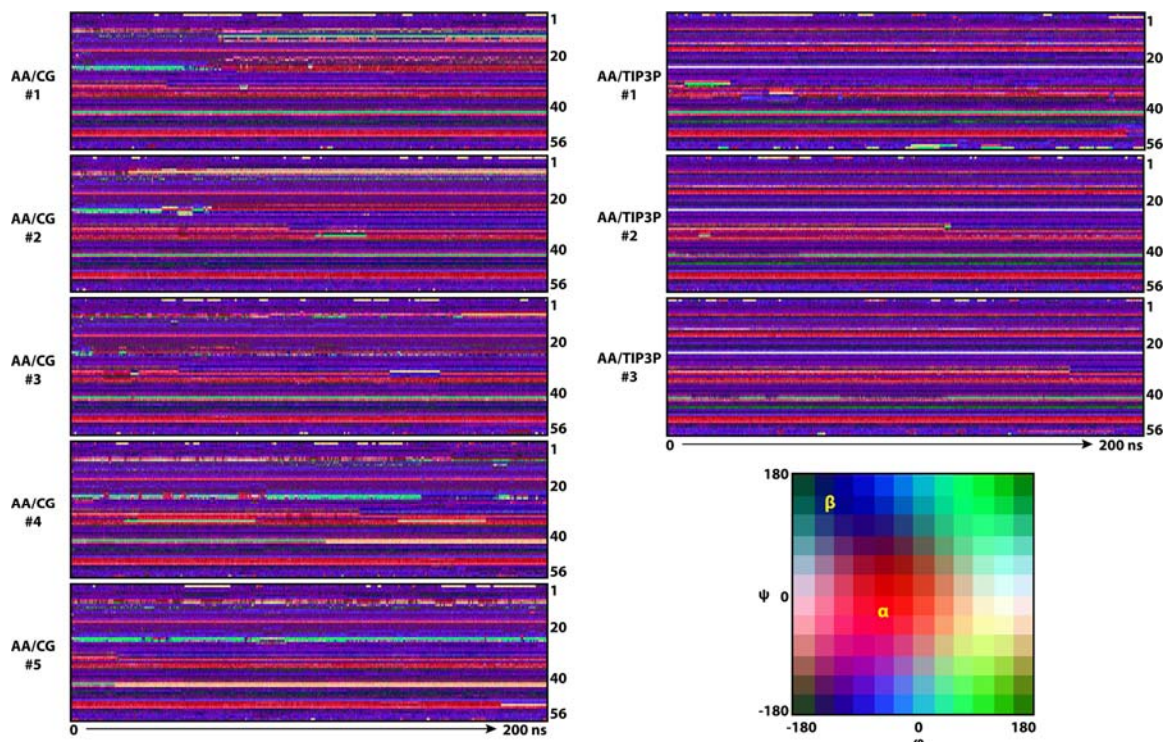

**Figure S5:** Time evolution of  $\phi/\psi$  backbone torsion angles for SH3 domain in AA/CG and AA/TIP3P simulations according to color diagram.

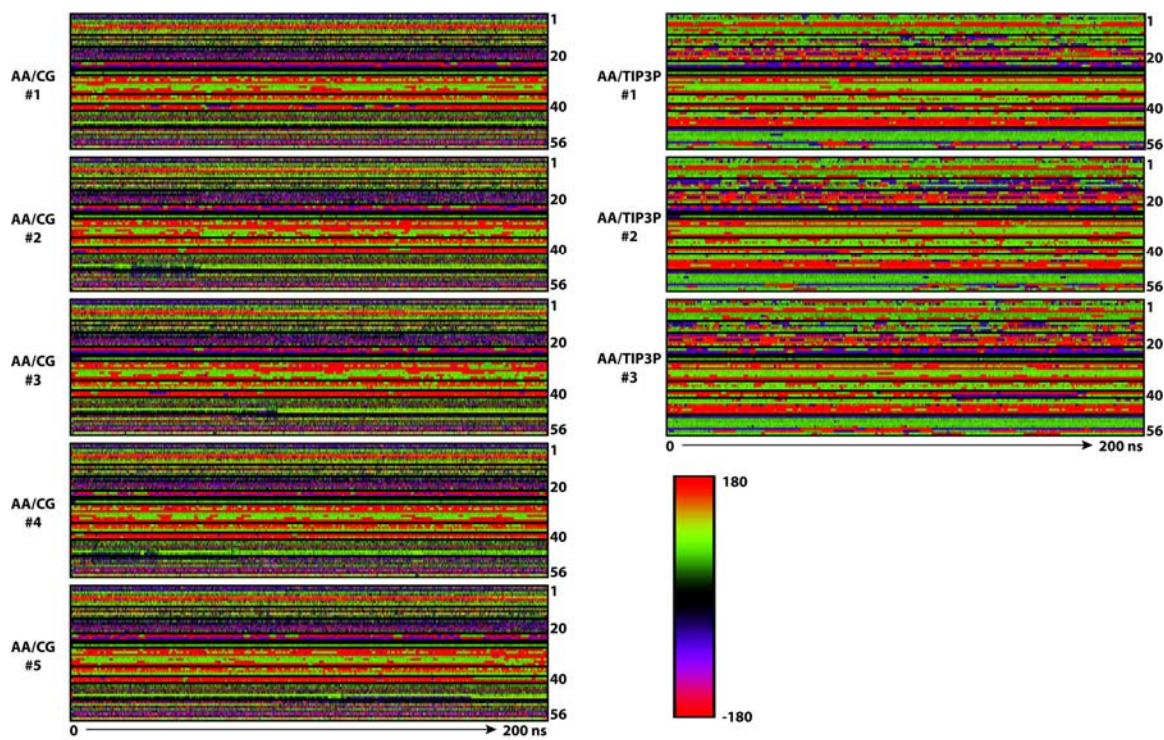

**Figure S6:** Time evolution of  $\chi_1$  side chain torsion angles for protein G in AA/CG and AA/TIP3P simulations according to color diagram.

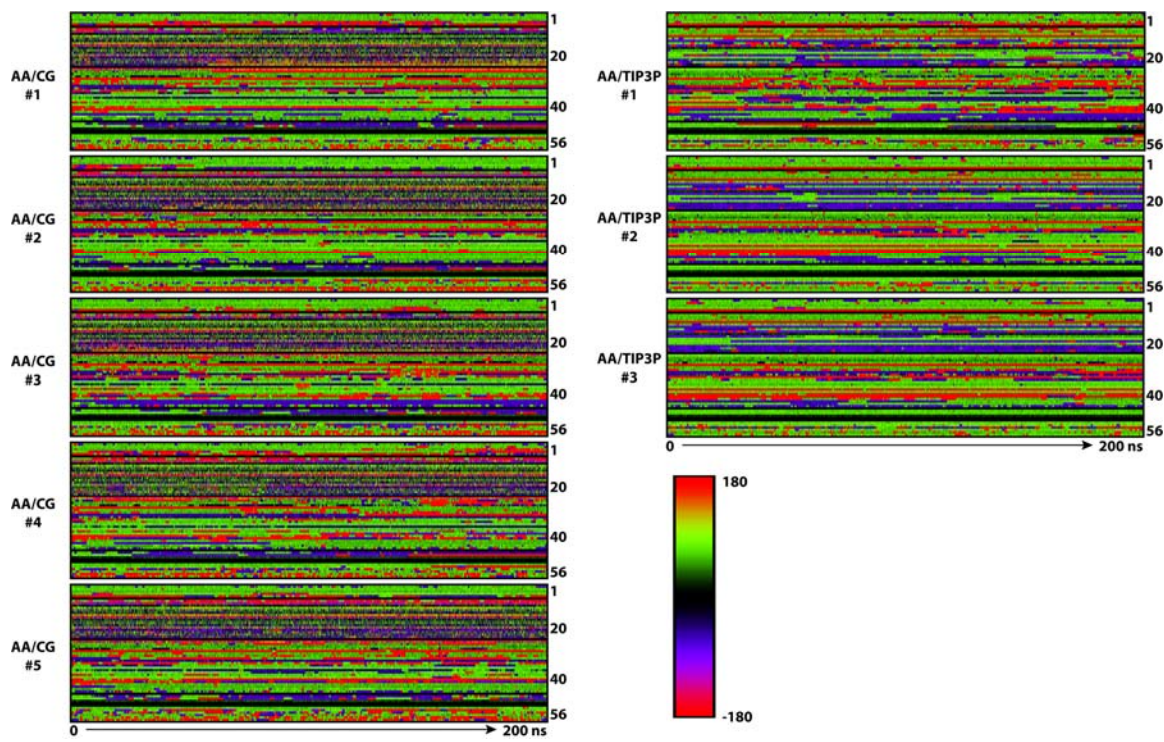

**Figure S7:** Time evolution of  $\chi_1$  side chain torsion angles for SH3 domain in AA/CG and AA/TIP3P simulations according to color diagram.
